# Supplementary material
Source: PubMed Central journal article supplement (PMC1691311)
Supplement: 12737654s01.pdf [file 12737654s01.pdf]

This is an electronic appendix to the paper by Levine *et al.* 2003 Mechanisms underlying the impacts of exotic plant invasions. *Proc. R. Soc. Lond. B* 270, 775—781. (DOI 10.1098/rspb.2003.2327.)

Electronic appendices are refereed with the text. However, no attempt has been made to impose a uniform editorial style on the electronic appendices.

## ELECTRONIC APPENDIX A. IMPACTS OF PLANT INVASIONS

| REFERENCE                                   | EXOTIC SPECIES                                                                 | CLIMATE       | HABITAT          | STUDY TYPE             | TYPE OF IMPACT                       |
|---------------------------------------------|--------------------------------------------------------------------------------|---------------|------------------|------------------------|--------------------------------------|
| <b>Impacts on plant community structure</b> |                                                                                |               |                  |                        |                                      |
| Abensperg-traun <i>et al.</i> 1988          | Numerous herbaceous species                                                    | Mediterranean | Woodland         | Observational          | Richness                             |
| Boyd 1992                                   | <i>Ammophila arenaria</i>                                                      | Mediterranean | Sand dunes       | Observational          | Composition                          |
| Braithwaite & Lonsdale 1987                 | <i>Mimosa pigra</i>                                                            | Temperate     | Floodplain       | Observational          | Richness                             |
| Daehler & Carino 1998                       | <i>Cenchrus ciliaris</i> , <i>Pennisetum setaceum</i> , <i>Panicum maximum</i> | Subtropical   | Grassland        | Observational          | Richness                             |
| Dunbar & Facelli 1999                       | <i>Orbea variegata</i>                                                         | Temperate     | Shrubland        | Observational          | Annual biomass                       |
| El-Ghaceb 1991                              | <i>Mesembryanthemum crystallinum</i>                                           | Mediterranean | desert           | Observational (Time)   | Composition                          |
| Fairfax & Fensham 2000                      | Exotic grasses                                                                 | Subtropical   | Pasture          | Observational          | Richness                             |
| Farnsworth & Meyerson 1999                  | <i>Phragmites australis</i>                                                    | Temperate     | Freshwater marsh | Removal                | Richness                             |
| Gould & Gorchov 2000                        | <i>Lonicera maaekii</i>                                                        | Temperate     | Forest           | Experimental           | Plant performance                    |
| Gremmen <i>et al.</i> 1998                  | <i>Agrostis stolonifera</i>                                                    | Subantarctic  | Riparian         | Observational          | Diversity and composition            |
| Holmes & Cowling 1997a, b                   | <i>Acacia saligna</i>                                                          | Mediterranean | Fynbos           | Observational          | Composition, diversity and dominance |
| Hutchinson & Vankat 1997                    | <i>Lonicera maaekii</i>                                                        | Temperate     | Forest           | Observational          | Richness of tree seedlings           |
| Keichiro & Shuichi 2000                     | <i>Leucaena leucocephala</i>                                                   | Temperate     | Forest           | Observational          | Native spp. richness and composition |
| Keller 2000                                 | <i>Lythrum salicaria</i> , <i>Phragmites australis</i>                         | Temperate     | Freshwater marsh | Observational          | Diversity and dominance              |
| Kwiatkowski <i>et al.</i> 1997              | <i>Carpinus betulus</i>                                                        | Temperate     | Forest           | Observational (Time)   | Richness                             |
| Lavergne <i>et al.</i> 1999                 | <i>Ligustrum robustum</i> ssp. <i>Walkeri</i>                                  | Tropical      | Forest           | Observational          | Composition                          |
| Lesica 1997                                 | <i>Phalaris arundinacea</i>                                                    | Temperate     | Freshwater marsh | Observational          | Composition                          |
| Lonsdale & Braithwaite 1988                 | <i>Mimosa pigra</i>                                                            | Temperate     | Floodplain       | Observational          | Richness                             |
| Martin 1999                                 | <i>Acer platanoides</i>                                                        | Temperate     | Forest           | Observational          | Seedling and sapling Richness        |
| McPherson <i>et al.</i> 1988                | <i>Prosopis glandulosa</i>                                                     | Semi-arid     | Grassland        | Observational          | Shrub composition                    |
| Morgan 1998                                 | Various                                                                        | Mediterranean | Grassland        | Observational          | Native spp. richness                 |
| Pysek & Pysek 1995                          | <i>Heracleum mantegazzium</i>                                                  | Temperate     | Various habitats | Observational          | Diversity                            |
| Richardson <i>et al.</i> 1989               | Various trees                                                                  | Mediterranean | Fynbos           | Observational/ Removal | Diversity                            |
| Richburg <i>et al.</i> 2001                 | <i>Phragmites australis</i>                                                    | Temperate     | Fen              | Observational          | Abundance                            |

|                                                       |                                                                         |               |                       |                              |                                         |
|-------------------------------------------------------|-------------------------------------------------------------------------|---------------|-----------------------|------------------------------|-----------------------------------------|
| Rose & Fairweather 1997                               | <i>Pitiosporum undulatum</i>                                            | Mediterranean | Shrubland             | Observational                | Native spp. richness and diversity      |
| Seabloom & Weidemann 1994                             | <i>Ammophila arenaria</i> and another                                   | Temperate     | Sand dunes            | Observational                | Diversity                               |
| Treberg & Husband 1999                                | <i>Lythrum salicaria</i>                                                | Temperate     | Wetland               | Observational                | Native and introduced spp. richness     |
| Tyser 1992                                            | <i>Phleum pratense</i> , <i>Centaurea maculosa</i>                      | Temperate     | Grassland             | Observational                | Composition and diversity               |
| Vivrette & Muller 1977                                | <i>Mesembryanthemum crystallinum</i>                                    | Mediterranean | Grassland             | Observational/Removal        | Composition                             |
| Wardle <i>et al.</i> 1995                             | <i>Senecio jacobaea</i>                                                 | Temperate     | Pasture               | Observational                | Composition and performance of spp.     |
| Weiss 1984                                            | <i>Chrysanthemoides monilifera</i>                                      | Temperate     | Sand dunes            | Observational                | Composition                             |
| Woods 1993                                            | <i>Lonicera tartarica</i>                                               | Temperate     | Forest                | Observational                | Herb richness, cover and composition    |
| Wyckoff & Webb 1996                                   | <i>Acer platanoides</i>                                                 | Temperate     | Forest                | Observational                | Understorey composition                 |
| <b>Competitive effects of exotic on native plants</b> |                                                                         |               |                       |                              |                                         |
| Ashton <i>et al.</i> 1998                             | <i>Pinus caribaea</i>                                                   | Tropical      | Oldfield              | Removal                      | Plant biomass                           |
| Baker & Wilson 2001                                   | <i>Agropyron cristatum</i>                                              | Temperate     | Prairie               | Observational/Removal        | Plant survival and growth rate          |
| Brooks 2000                                           | <i>Bromus rubens</i> , <i>Schismus arabicus</i> ,<br><i>S. barbatus</i> | Desert        | Grassland             | Removal                      | Density and biomass of native spp.      |
| Buman <i>et al.</i> 1988                              | <i>Bromus tectorum</i>                                                  | Temperate     | Grassland             | Replacement series           | Plant biomass                           |
| Burdon & Chilvers 1994                                | <i>Pinus radiata</i>                                                    | Temperate     | Sclerophyllous forest | Neighbourhood analysis       | Plant growth                            |
| Busch & Smith 1995                                    | <i>Tamarix ramosissima</i>                                              | Semi-arid     | Riparian Zone         | Removal                      | Water Use                               |
| D'Antonio & Mahall 1991                               | <i>Carpobrotus edulis</i>                                               | Mediterranean | Coastal scrub         | Removal                      | Plant size and soil water availability  |
| D'Antonio <i>et al.</i> 1998                          | <i>Schizachyrium condensatum</i>                                        | Subtropical   | Woodland              | Removal                      | Plant biomass                           |
| Dillenburg <i>et al.</i> 1993                         | <i>Lonicera japonica</i>                                                | Temperate     | Coastal plain         | Removal                      | Plant performance                       |
| Gentle & Duggin 1997                                  | <i>Lantana camara</i>                                                   | Temperate     | Forest                | Removal/ Addition            | Seedling growth                         |
| Gentle & Duggin 1998                                  | <i>Lantana camara</i>                                                   | Temperate     | Forest                | Addition/ Replacement series | Seedling growth                         |
| Gillispie <i>et al.</i> 1994                          | <i>Trifolium repens</i>                                                 | Temperate     | Fallow                | Removal                      | Plant growth                            |
| Hester & Hobbs 1992                                   | Various annuals                                                         | Mediterranean | Shrubland             | Removal                      | Cover of natives                        |
| Hobbs & Atkins 1991                                   | <i>Ursinia anthemoides</i>                                              | Mediterranean | Heathland             | Addition                     | Plant growth                            |
| Huenneke & Thomson 1994                               | <i>Dipsacus sylvestris</i>                                              | Temperate     | Grassland             | Replacement series           | Plant growth                            |
| Melgoza <i>et al.</i> 1990                            | <i>Bromus tectorum</i>                                                  | Temperate     | Grassland             | Removal                      | Plant biomass and soil water content    |
| Mesléard <i>et al.</i> 1993                           | <i>Paspalum paspaloides</i>                                             | Temperate     | Marsh                 | Replacement series           | Plant growth                            |
| Nadkarni <i>et al.</i> 1986                           | <i>Lolium multiflorum</i>                                               | Mediterranean | Chaparral             | Addition                     | Biomass, density and richness           |
| Nelson & Allen 1993                                   | <i>Avena barbata</i>                                                    | Mediterranean | Grassland             | Addition                     | Plant performance                       |
| Randall & Rejmanek 1993                               | <i>Cirsium vulgare</i>                                                  | Mediterranean | Forest                | Neighbourhood analysis       | Seedling growth                         |
| Romo & Eddlemem 1987                                  | <i>Bromus japonicus</i>                                                 | Temperate     | Prairie               | Removal                      | Plant performance                       |
| <b>Impacts on animal populations and communities</b>  |                                                                         |               |                       |                              |                                         |
| Auerbach & Simberloff 1988                            | <i>Quercus acutissima</i> , <i>Castanea crenata</i>                     | Sub-tropical  | Forest                | Observational                | Density, and performance of leaf miners |

|                            |                                                                                          |               |                         |                                 |                                            |
|----------------------------|------------------------------------------------------------------------------------------|---------------|-------------------------|---------------------------------|--------------------------------------------|
| Bell <i>et al.</i> 1987    | Various forbs                                                                            | Mediterranean | Shrub scrub and forest  | Observational                   | Diet expansion of tamar                    |
| Bock <i>et al.</i> 1986    | <i>Eragrostis</i> spp.                                                                   | Semi-arid     | Grassland               | Observational                   | Diversity and abundance of various animals |
| Belnap & Phillips 2001     | <i>Bromus tectorum</i>                                                                   | Semi-arid     | Grassland               | Observational                   | Soil food web                              |
| Bowers <i>et al.</i> 1992  | <i>Plantago lanceolata</i>                                                               | Temperate     | Meadow                  | Host preference trials          | Diet expansion of checkerspot              |
| Brown & Mitchell 2001      | <i>Lythrum salicaria</i>                                                                 | Temperate     | Wetland                 | Manipulation of pollen          | Pollen transfer                            |
| Bruzzese 1980              | <i>Rubus fruticosus</i> , <i>R. procerus</i>                                             | Various       | Various habitats        | Observational                   | Phytophagous diversity                     |
| Carrol <i>et al.</i> 1997  | <i>Koelerteria elegans</i>                                                               | Subtropical   | Forest                  | Host preference trials          | Insect performance                         |
| Carrol <i>et al.</i> 1998  | <i>Koelerteria elegans</i>                                                               | Subtropical   | Forest                  | Host preference trials          | Host shift of soapberry bug                |
| Chittka & Schürkens 2001   | <i>Impatiens glandulifera</i>                                                            | Temperate     | River bank              | Addition                        | Pollinator visit                           |
| Chown & Block 1997         | <i>Poa annua</i>                                                                         | Antarctic     | Tussock grassland       | Host preference trials          | Insect size                                |
| Crisp <i>et al.</i> 1998   | Various shrubs                                                                           | Temperate     | Shrubland and grassland | Observational                   | Beetle diversity                           |
| Feare <i>et al.</i> 1997   | <i>Portulaca oleracea</i>                                                                | Tropical      | Woodlands               | Observational                   | Bird nest density                          |
| Fraser & Grove 1990        | Acacias and pines                                                                        | Mediterranean | Fynbos                  | Observational                   | Bird guilds and insect diversity           |
| Goergen & Daehler 2001     | <i>Pennisetum setaceum</i>                                                               | Tropical      | Grassland               | Observational                   | Seed predation                             |
| Goss-Custard & Moser 1988  | <i>Spartina anglica</i>                                                                  | Temperate     | Mudflat                 | Observational                   | Dunlin density                             |
| Guix 2000 a                | <i>Carpobrotus edulis</i> , <i>Solanum nigrum</i>                                        | Temperate     | Forest and open dunes   | Survey of seeds in faeces       | Diet expansion of foxes                    |
| Guix 2000 b                | Various shrubs                                                                           | Temperate     | Forest                  | Survey of seeds in faeces       | Diet expansion of birds                    |
| Kourtev <i>et al.</i> 1999 | <i>Berberis thunbergii</i> , <i>Microstegium vimineum</i>                                | Temperate     | Hardwood forests        | Observational                   | Earthworm density                          |
| Lagerlöf & Wallin 1993     | <i>Elytrigia repens</i>                                                                  | Temperate     | Agroecosystem           | Observational                   | Diversity of arthropod guilds              |
| Lambrinos 2000             | <i>Cortaderia jubata</i>                                                                 | Mediterranean | Maritime chaparral      | Observational                   | Arthropod and rodent diversity             |
| Ramos 1996                 | Various shrubs                                                                           | Temperate     | Forest                  | Observational                   | Density of bullfinch                       |
| Schellborn & Sork 1997     | Various shrubs                                                                           | Temperate     | Agroecosystem           | Addition                        | Predation on crop pests                    |
| Slobodchikoff & Doyen 1977 | <i>Ammophila arenaria</i>                                                                | Mediterranean | Coastal dunes           | Observational                   | Diversity and abundance of arthropods      |
| Schmidt & Whelan 1999      | <i>Rhamnus cathartica</i> , <i>Lonicera maackii</i>                                      | Temperate     | Deciduous forest        | Observational                   | Predation of robin nests                   |
| Sheldon & Creed 1995       | <i>Myriophyllum spicatum</i>                                                             | Temperate     | Lake                    | Host preference trials          | Diet shift of a weevil                     |
| Thomas <i>et al.</i> 1987  | <i>Plantago lanceolata</i>                                                               | Temperate     | Meadow                  | Host preference trials          | Oviposition choice of a butterfly          |
| Toft <i>et al.</i> 2001    | <i>Tradescantia fluminensis</i>                                                          | Temperate     | Forest                  | Observational                   | Insect richness                            |
| Trammell & Butler 1995     | <i>Euphorbia esula</i> , <i>Bromus inermis</i> , <i>B. japonica</i> , <i>B. tectorum</i> | Mediterranean | Prairie and forest      | Observation of pellet densities | Ungulate use of habitat                    |
| Vilà & D'Antonio 1998      | <i>Carpobrotus edulis</i>                                                                | Mediterranean | Coastal scrub           | Fruit trials                    | Diet expansion of mammals                  |
| Vilà <i>et al.</i> 1998    | <i>Carpobrotus edulis</i>                                                                | Mediterranean | Coastal scrub           | Observational                   | Diet expansion of pollinators              |
| Whelan & Willson 1994      | <i>Lonicera maackii</i>                                                                  | Temperate     | Deciduous forest        | Fruit trials                    | Fruit preference                           |
| Williams & Karl 1996       | Various shrubs                                                                           | Temperate     | Forest                  | Survey of seeds in faeces       | Diet expansion of birds                    |

## Impacts on hydrology

|                                    |                                                       |                       |                   |                             |                                           |
|------------------------------------|-------------------------------------------------------|-----------------------|-------------------|-----------------------------|-------------------------------------------|
| Borman <i>et al.</i> 1992          | <i>Cynosurus echinatus</i>                            | Temperate             | Grassland         | Observational               | Soil moisture                             |
| Cline <i>et al.</i> 1977           | <i>Bromus tectorum</i>                                | Temperate             | Shrub-steppe      | Observational               | Soil moisture                             |
| Dukes 2001                         | <i>Centaurea solstitialis</i>                         | Mediterranean         | Grassland         | Microcosm                   | Water balance                             |
| Dyer & Rice 1999                   | European annual grasses                               | Mediterranean         | Grassland         | Observational               | Soil moisture                             |
| Gerlach 2000                       | <i>Centaurea solstitialis</i>                         | Mediterranean         | Grassland         | Observational               | Soil moisture                             |
| Holmes & Rice 1996                 | <i>Bromus diandrus</i>                                | Mediterranean         | Grassland         | Microcosm                   | Soil moisture                             |
| Kremer & Running 1996              | <i>Bromus tectorum</i>                                | Temperate             | Shrub-steppe      | Observ. & Modelling         | Soil moisture                             |
| Lacey <i>et al.</i> 1989           | <i>Centaurea maculosa</i>                             | Temperate             | Grassland         | Observational               | Runoff                                    |
| Le Maitre <i>et al.</i> 2000       | Several woody species                                 | Mediterranean         | Various           | Modelling                   | Water use                                 |
| Mueller-Dombois 1973               | <i>Andropogon virginicus</i>                          | Hawaii                | Forest            | Observational               | Evapotranspiration                        |
| Sala <i>et al.</i> 1996            | <i>Tamarix ramosissima</i>                            | Semi-arid             | Riparian          | Observational               | Sap flow                                  |
| Sharma 1984                        | <i>Pistia stratiotes</i>                              | Tropical/ Subtropical | Aquatic           | Microcosm                   | Water use                                 |
| Shukla <i>et al.</i> 1990          | <i>African pasture grasses</i>                        | Amazonia              | Forest            | Modelling                   | Climate                                   |
| Specht 2000                        | European annuals                                      | Australia             | Savannah woodland | Modelling                   | Ecophysiology                             |
| Van Lill <i>et al.</i> 1980        | <i>Eucalyptus grandis</i>                             | South Africa          | Grassland         | Observational               | Catchment streamflow                      |
| <b>Impacts on nutrient cycling</b> |                                                       |                       |                   |                             |                                           |
| Amiotti <i>et al.</i> 2000         | <i>Pinus radiata</i>                                  | Temperate             | Grassland         | Observational               | Various soil nutrients and pH             |
| Asner & Beatty 1996                | <i>Melinis minutiflora</i>                            | Tropical              | Shrubland         | Observational               | Soil nitrogen processes                   |
| Cameron & Spencer 1989             | <i>Sapium sebiferum</i>                               | Subtropical           | Grassland         | Observational               | Various soil nutrients                    |
| Cannon <i>et al.</i> 1995          | <i>Salsola tragus (kali)</i>                          | Mediterranean         | Grassland         | Experimental                | Soil P                                    |
| Christian & Wilson 1999            | <i>Agropyron cristatum</i>                            | Temperate             | Grassland         | Observational               | Soil N and C                              |
| D'Antonio <i>et al.</i> 1998       | <i>Schizachyrium condensatum</i> & other grasses      | Tropical              | Dry Forest        | Removal                     | Available N                               |
| Dascanio <i>et al.</i> 1994        | <i>Ligustrum lucidum</i>                              | Subtropical           | Forest            | Observational               | Biomass and litter decomposition          |
| Dormaar <i>et al.</i> 1995         | <i>Agropyron cristatum</i>                            | Temperate             | Grassland         | Observational               | Soil N, P and OM                          |
| Egunjobi 1969                      | <i>Ulex europaeus</i>                                 | Temperate             | Temperate forest  | Observational               | Soil and litter N                         |
| Egunjobi 1971                      | <i>Ulex europaeus</i>                                 | Temperate             | Temperate forest  | Observational               | Annual dry matter production              |
| El-Ghareeb 1991                    | <i>Mesembryanthemum crystallinum</i>                  | Mediterranean         | Desert            | Observational               | Soil OM, soil salinity                    |
| Ehrenfeld <i>et al.</i> 2001       | <i>Berberis thunbergii, Microstegium vimineum</i>     | Temperate             | Deciduous forest  | Experimental, observational | Various soil nutrients and N min.         |
| Evans <i>et al.</i> 2001           | <i>Bromus tectorum</i>                                | Arid                  | Grassland         | Observational               | Various soil nutrients                    |
| Johnson & Wedin 1997               | <i>Hyparrhenia rufa</i>                               | Tropical              | Dry Forest        | Observational               | Various soil nutrients and C              |
| Ley & D'Antonio 1998               | <i>Schizachyrium condensatum, Melinis minutiflora</i> | Subtropical           | Montane woodland  | Observational               | N fixation rate                           |
| Mack <i>et al.</i> 2001            | <i>Schizachyrium condensatum, M. minutiflora</i>      | Subtropical           | Montane woodland  | Experimental, observational | Various aspects of ecosystem N+production |
| Milton & Siegfried 1981            | <i>Acacia saligna, A. cyclops</i>                     | Mediterranean         | Shrubland         | Observational               | Aboveground biomass                       |

|                                                 |                                                       |               |                    |                             |                                            |
|-------------------------------------------------|-------------------------------------------------------|---------------|--------------------|-----------------------------|--------------------------------------------|
| Musil 1993                                      | <i>Acacia saligna</i>                                 | Mediterranean | Shrubland          | Observational               | Various soil nutrients and pH              |
| Musil & Midgley 1990                            | <i>Acacia saligna</i>                                 | Mediterranean | Shrubland          | Observational               | Various soil nutrients and pH              |
| Pickart <i>et al.</i> 1998                      | <i>Lupinus arboreus</i>                               | Mediterranean | Coastal dunes      | Observational               | Soil nutrients and OM                      |
| Ogle <i>et al.</i> 2001                         | <i>Bromus japonicus, B. tectorum</i>                  | Temperate     | Grassland          | Experimental                | Above- and below-ground biomass            |
| Scott <i>et al.</i> 2001                        | <i>Hieracium pilosella</i>                            | Temperate     | Grassland          | Observational               | Soil C and N cycling                       |
| Smoliak & Dormaar 1985                          | <i>Agropyron cristatum</i>                            | Temperate     | Grassland          | Observational               | Dry matter production, soil C, N and pH    |
| Sparling <i>et al.</i> 1994                     | <i>Ulex europaeus</i>                                 | Temperate     | Temperate forest   | Observational               | Soil and microbial C, N, and P             |
| Stock <i>et al.</i> 1995                        | <i>Acacia saligna</i>                                 | Mediterranean | Shrubland          | Observational               | Soil nutrients, OM and aboveground biomass |
| Svejar & Sheeley 2001                           | <i>Bromus tectorum</i>                                | Arid          | Shrubland          | Observational               | Soil N dynamics                            |
| van Wilgen & Richardson 1985                    | <i>Hakea sericea, Acacia saligna</i>                  | Mediterranean | Shrubland          | Observational               | Aboveground biomass                        |
| Vitousek & Walker 1989                          | <i>Myrica faya</i>                                    | Tropical      | Woodland           | Observational               | N fixation rate                            |
| Vivrette & Muller 1977                          | <i>Mesembryanthemum crystallinum</i>                  | Mediterranean | Grassland          | Observational               | Soil osmotic level                         |
| Witkowski 1991                                  | <i>Acacia saligna</i>                                 | Mediterranean | Shrubland          | Observational               | Various soil nutrients, OM and pH          |
| Witkowski & Mitchell 1987                       | <i>Acacia cyclops</i>                                 | Mediterranean | Shrubland          | Observational               | Soil total N and P                         |
| <b>Impacts on fire regime</b>                   |                                                       |               |                    |                             |                                            |
| Anable <i>et al.</i> 1992                       | <i>Eragrostis lehmanniana</i>                         | Arid          | Desert grassland   | observational               | Fire frequency                             |
| Baird 1977                                      | <i>Ehrhardia calycina</i>                             | Temperate     | Woodland           | observational               | Fire frequency                             |
| Bell 1997                                       | <i>Arundo donax</i>                                   | Mediterranean | Chaparral          | observational               | Fire frequency and intensity               |
| Bilbao 1995                                     | <i>Hyparrhenia rufa</i>                               | Tropical      | Savanna            | observational, experimental | Fire intensity                             |
| Blydenstein 1967, Medina 1987                   | Several grasses                                       | Tropical      | Savanna            | observational               | Fire intensity                             |
| Brooks 1998, Brown & Minnich 1986, Beatley 1966 | <i>Bromus rubens, B. tectorum, Schismus spp.</i>      | Arid          | Desert shrubland   | observational               | Fire frequency                             |
| Búrquez & Quintana 1994                         | <i>Pennisetum ciliare</i>                             | Arid          | Desert woodland    | observational               | Fire frequency                             |
| Busch 1995                                      | <i>Tamarix ramossisima</i>                            | Arid          | Desert floodplains | observational               | Fire frequency                             |
| Cable 1971                                      | <i>Eragrostis lehmanniana</i>                         | Arid          | Desert grassland   | anecdotal                   | Fire frequency                             |
| Freifelder <i>et al.</i> 1998                   | <i>Schizachyrium condensatum, Melinis minutiflora</i> | Subtropical   | Woodland           | Modelling                   | Fire spread rate                           |
| Gill <i>et al.</i> 1990                         | <i>Pennisetum polystachum, Melinis minutiflora</i>    | Temperate     | Forest             | anecdotal                   | Fire frequency                             |
| Gordon 1998                                     | <i>Melaleuca quinquinervia</i>                        | Subtropical   | Prairie            | anecdotal                   | Fire intensity                             |
| Haidinger & Keeley 1993                         | Various annual grasses and forbs                      | Mediterranean | Chaparral          | observational               | Fire frequency                             |
| Janzen 1988                                     | <i>Hyparrhenia rufa</i>                               | Tropical      | Dry forest         | anecdotal                   | Fire frequency                             |
| Latz 1991                                       | <i>Cenchrus ciliare</i>                               | Subtropical   | Riparian woodland  | anecdotal                   | Fire frequency and size                    |
| Lippincott 2000                                 | <i>Imperata cylindrica</i>                            | Subtropical   | Savanna            | experimental                | Fire intensity                             |
| Menke 1989                                      | <i>Taeniatherum caput-medusae</i>                     | Arid          | Desert shrubland   | anecdotal                   | Fire frequency                             |

|                                        |                                                                 |                     |                      |               |                                    |
|----------------------------------------|-----------------------------------------------------------------|---------------------|----------------------|---------------|------------------------------------|
| Smith & Tunison 1992                   | Various grasses                                                 | Subtropical, alpine | Woodland             | observational | Fire intensity                     |
| Steward & Hull 1949                    | <i>Bromus tectorum</i>                                          | Arid                | Desert shrubland     | anecdotal     | Fire frequency, timing             |
| Tunison <i>et al.</i> 1994, 1995, 2001 | Various grasses                                                 | Subtropical         | Woodland & shrubland | observational | Fire frequency, size and intensity |
| van Wilgen & Richardson 1985           | <i>Acacia saligna</i> , <i>Hakea sericea</i>                    | Mediterranean       | Fynbos               | Modelling     | Fire frequency and intensity       |
| van Wilgen & van Hensbergen 1992       | <i>Pinus</i> spp., <i>Acacia saligna</i> , <i>Hakea sericea</i> | Mediterranean       | Fynbos               | Modelling     | Fire intensity                     |
| Whisenant 1990                         | <i>Bromus tectorum</i>                                          | Arid                | Desert shrubland     | observational | Fire frequency, timing             |
| Zedler <i>et al.</i> 1983              | <i>Lotium perenne</i>                                           | Mediterranean       | Coastal shrubland    | observational | Fire frequency                     |

## ON-LINE APPENDIX REFERENCES

- Abensperg-traun, M., Atkins, L., Hobbs, R. & Steven, D. 1998 Exotic plant invasion and understorey species richness: a comparison of two types of eucalypt woodland in agricultural Western Australia. *Pacific Conservation Biology* 4, 21-32.
- Amiotti, N. M., Zalba, P., Sánchez, L. F., & Peinemann, N. 2000 The impact of single trees on properties of loess-derived grassland soils in Argentina. *Ecology* 81, 3283-3290.
- Anable, M. E., McClaran, M. P. & Ruyle, G. B. 1992 Spread of introduced Lehmann lovegrass *Eragrostis lehmanniana* Nees. in Southern Arizona. USA. *Biological Conservation* 61, 181-188.
- Ashton, P. M. S., Gamage, S., Gunatilleke, I. A. U. N. & Gunatilleke, C. V. S. 1998 Using Caribbean pine to establish a mixed plantation: testing effects of pine canopy removal on plantings of rain forest tree species. *Forest Ecology and Management* 106, 211-222.
- Asner, G. P. & Beatty, S. W. 1996 Effects of an African grass invasion on Hawaiian shrubland nitrogen biogeochemistry. *Plant and Soil* 186, 205-211.
- Auerbach, M. & Simberloff, D. 1988 Rapid leaf-miner colonization of introduced trees and shifts in sources of herbivore mortality. *Oikos* 52, 41-50.
- Baird, A. M. 1977 Regeneration after fire in King's Park, Western Australia. *Journal of the Royal Society of Western Australia* 60, 1-22.
- Bakker, J. & Wilson, S. 2001 Competitive abilities of introduced and native grasses. *Plant Ecology* 157, 117-125.
- Beatley, J. C. 1966 Ecological status of introduced brome grass (*Bromus* spp.) in desert vegetation of Southern Nevada. *Ecology* 47, 548-554.
- Bell, G. P. 1997 Ecology and management of *Arundo donax*, and approaches to riparian habitat restoration in Southern California. In *Plant invasions: studies from North America and Europe* (ed. J. H. Brook), pp. 103-113. The Netherlands: Leiden.
- Bell, D. T., Moredoundt, J. C. & Loneragan, W. A. 1987. Grazing pressure by the tammar (*Macropus eugenii* Desm.) on the vegetation of Garden Island, Western Australia, and the potential impact of food reserves of a controlled burning regime. *Journal of the Royal Society of Western Australia* 69, 89-94.
- Belnap, J. & Phillips, S. L. 2001 Soil biota in an ungrazed grassland: response to annual grass (*Bromus tectorum*) invasion. *Ecological Applications* 11, 1261-1275.
- Bilbao, B. 1995 *Impacto del régimen de quemas en las características edáficas, producción de materia orgánica y biodiversidad de sabanas tropicales en Calabozo, Venezuela*. PhD Dissertation, Instituto Venezolano de Investigaciones científicas (IVIC).
- Blydenstein, J. 1967 Tropical savanna vegetation of the Llanos of Colombia. *Ecology* 48, 1-15.
- Bock, C. E., Bock, J. H., Jepson, K. L. & Ortega, J. C. 1986 Ecological effects of planting African lovegrasses in Arizona. *National Geographic Research* 2, 456-463.
- Borman, M. M., Johnson, D. E. & Krueger, W. C. 1992 Soil moisture extraction by vegetation in a Mediterranean/maritime climatic regime. *Agronomy Journal* 84, 897-904.

- Bowers, M. D., Stamp, N. E. & Collinge, S. K. 1992 Early stage of host range expansion by a specialist herbivore, *Euphydryas phaeton* (Nymphalidae). *Ecology* 73, 526-536.
- Boyd, R. S. 1992 Influence of *Ammophila arenaria* on foredune plant microdistributions at Point Reyes National Seashore, California. *Madroño* 39, 67-76.
- Braithwaite, R. W., Lonsdale, W. M. & Estbergs, J. A. 1989 Alien vegetation and native biota in tropical Australia: the impact of *Mimosa pigra*. *Biological Conservation* 48, 189-210.
- Brooks, M. L. 1998 *Ecology of a biological invasion: alien annual plants in the Mojave desert*. PhD Dissertation, University of California, Riverside.
- Brooks, M. L. 2000 Competition between alien annual grasses and native annual plants in the Mojave desert. *American Naturalist* 144, 92-108.
- Brown, B. J. & Mitchell, R. J. 2001 Competition for pollination: effects of pollen of an invasive plant on seed set of a native congener. *Oecologia* 129, 43-49.
- Brown, D. E. & Minnich R. A. 1986 Fire and changes in creosote bush scrub of the western Sonoran desert, California. *American Midland Naturalist* 116, 411-422.
- Bruzesse, E. 1980 The phytophagous insect fauna of *Rubus* spp. (Rosaceae) in Victoria, a study on the biological control of blackberry (*Rubus fruticosus* L. Agg.). *Journal of the Australian Entomology Society* 19: 1-6.
- Buman, R. A., Monsen, S. B. & Abernethy, R. H. 1988. Seedling competition between mountain rye, "Hycrest" crested wheatgrass, and downy brome. *Journal of Range Management* 41, 30-34.
- Burdon, J. J. & Chilvers, G. A. 1994 Demographic changes and the development of competition in a native Australian eucalypt forest invaded by exotic pines. *Oecologia* 97, 419-423.
- Búrquez, A. & Quintana, M. 1994 Islands of diversity: ironwood ecology and the richness of perennials in a Sonoran desert biological reserve. *Occasional Papers in Conservation Biology* 1, 22-27.
- Busch, D. E. & Smith, S. D. 1995 Mechanisms associated with decline of woody species in riparian ecosystems of the Southwestern U.S. *Ecological Monographs* 65, 347-370.
- Busch, D. E. 1995 Effects of fire on Southwestern riparian plant community structure. *Southwestern Naturalist* 40, 259-267.
- Cable, D. R. 1971 Lehmann lovegrass on the Santa Rita Experimental Range, 1937-1968. *Journal of Range Management* 24, 17-21.
- Cameron, G. N. & Spencer, S. R. 1989 Rapid leaf decay and nutrient release in a chinese tallow forest. *Oecologia* 80, 222-228.
- Cannon, J. P., Allen, E. B., Allen, M. F., Dudley, L. M., & Jurinak, J. J. 1995 The effects of oxalates produced by *Salsola tragus* on the phosphorus nutrition of *Stipa pulchra*. *Oecologia* 102, 265-272.
- Carrol, S. P., Dingle, H. & Klassen, S. P. 1997 Genetic differentiation of fitness-associated traits among rapidly evolving populations of the soapberry bug. *Evolution* 5, 1182-1188.



- Carrol, S. P., Klassen, S. P., Dingle, H. 1998 Rapidly evolving adaptations to host ecology and nutrition in the soapberry bug. *Evolutionary Ecology* 12, 955-968.
- Chown, S. L. & Block, W. 1997 Comparative nutritional ecology of grass-feeding in a sub-Antarctic beetle: the impact of introduced species on *Hydromedion spartum* from South Georgia. *Oecologia* 111, 216-224.
- Christian, J. M. & Wilson, S. D. 1999 Long-term ecosystem impacts of an introduced grass in the northern Great Plains. *Ecology* 80, 2397-3407.
- Cline, J. F., Uresk, D. W. & Rickard, W. H. 1977 Comparison of water used by a sagebrush-bunchgrass community and a cheatgrass community. *Journal of Range Management* 30, 199-201.
- Crisp, P. N., Dickinson, K. J. M. & Gibbs, G. W. 1998 Does native invertebrate diversity reflect native plant diversity? A case study from New Zealand and implications for conservation. *Biological Conservation* 83, 209-220.
- Daehler, C. C. & Carino, D. A. 1998 Recent replacement of native Pili grass (*Heteropogon contortus*) by invasive African grasses in the Hawaiian islands. *Pacific Science* 52, 220-227.
- D'Antonio, C. M. & Mahall, B. E. 1991 Root profiles and competition between the invasive, exotic perennial, *Carpobrotus edulis*, and two native shrub species in California coastal scrub. *American Journal of Botany* 78, 885-894.
- D'Antonio, C. M., Hughes, R. F., Mack, M., Hitchcock, D. & Vitousek, P. M. 1998. The response of native species to removal of invasive exotic grasses in a seasonally dry Hawaiian woodland. *Journal Vegetal Science* 9, 699-712.
- Dascanio, L. M., Barrera, M. D. & Frangi, J. L. 1994 Biomass structure and dry matter dynamics of subtropical alluvial and exotic *Ligustrum* forests at the Rio de la Plata, Argentina. *Vegetatio* 115, 61-76.
- Dillenburg, L. D., Whigham, D. F., Teramura, A. H. & Forseth, I. N. 1993 Effects of below- and aboveground competition from the vines *Lonicera japonica* and *Parthenocissus quiquefolia* on the growth of the tree host *Liquidambar styraciflua*. *Oecologia* 93, 48-54.
- Dormaar, J. F., Naeth, M. A., Willms, W. D., & Chanasyk, D. S. 1995 Effect of native prairie, crested wheatgrass (*Agropyron cristatum* (L.) Gaertn.) and Russian wildrye (*Elymu junceus* Fisch.) on soil chemical properties. *Journal of Range Management* 48, 258-263.
- Dukes, J. S. 2001 Biodiversity and invasibility in grassland microcosms. *Oecologia* 126, 563-568.
- Dunbar, K. R. & Facelli, J. M. 1999 The impact of a novel invasive species, *Orbea variegata* (African carrion flower), on the chenopod shrublands of South Australia. *Journal of Arid Environments* 41, 37-48.
- Dyer, A. R. & Rice, K. J. 1999 Effects of competition on resource availability and growth of a California bunchgrass. *Ecology* 80, 2697-2710.

- Egunjobi, J. K. 1969 Dry matter and nitrogen accumulation in secondary successions involving gorse (*Ulex europaeus* L.) and associated shrubs and trees. *New Zealand Journal of Science* 12, 175-193.
- Egunjobi, J. K. 1971 Ecosystem processes in a stand of *Ulex europaeus* L. I. Dry matter production, litter fall and efficiency of solar energy utilization. *Journal of Ecology* 59, 31-38.
- Ehrenfeld, J. G., Koutev, P. & Huang, W. 2001 Changes in soil functions following invasions of exotic understorey plants in deciduous forests. *Ecological Applications* 11, 1287-1300.
- El-Ghareeb, R. 1991 Vegetation and soil changes induced by *Mesembrianthemum crystallinum* L. in a Mediterranean desert ecosystem. *Journal of Arid Environments* 20, 321-330.
- Evans, R. D., Rimer, R., Sperry, L. & Belnap, J. 2001 Exotic plant invasion alters nitrogen dynamics in an arid grassland. *Ecological Applications* 11, 1301-1310.
- Fairfax, R. J. & Fensham, R. J. 2000 The effect of exotic pasture development on floristic diversity in central Queensland, Australia. *Biological Conservation* 94, 11-21.
- Farnsworth, E. J. & Meyerson, L. A. 1999 Species composition and inter-annual dynamics of a freshwater tidal plant community following removal of the invasive grass, *Phragmites australis*. *Biological Invasions* 1, 115-127.
- Feare, C. J., Gill, E. L., Carty, P., Carty, H. E., Ayrton, V. J. 1997 Habitat use by Seychelles sooty terns *Sterna fuscata* and implications for colony management. *Biological Conservation* 81, 69-76.
- Fraser, M. W. & Grove, T. M. 1990 Effect of alien plant invasion on the birds of mountain fynbos in the Cape of Good Hope Nature Reserve. *South African Journal of Zoology* 25, 97-108.
- Freifelder, R., Vitousek, P. M. & D'Antonio, C. M. 1998 Microclimate effects of fire-induced forest/grassland conversion in a seasonally dry Hawaiian woodland. *Biotropica* 30, 286-297.
- Gentle, C. B. & Duggin, J. A. 1997 Allelopathy as a competitive strategy in persistent thickets of *Lantana camara* L. in three Australian forest communities. *Plant Ecology* 132, 85-95.
- Gentle, C. B. & Duggin, J. A. 1998 Interference of *Choricarpia leptopetala* by *Lantana camara* with nutrient enrichment in mesic forests on the Central COSAT of NSW. *Plant Ecology* 136, 205-211.
- Gerlach, J. D., Jr. 2000 *A model experimental system for predicting the invasion success and ecosystem impacts of non-indigenous summer-flowering annual plants in California's Central Valley grasslands and oak woodlands*. PhD Dissertation, University of California, Davis.
- Gill, A. M., Hoare, J. R. L. & Cheney, N. P. 1990 Fires and their effect in the wet-dry tropics of Australia. In *Fire in the tropical biota: ecosystem processes and global challenges* (eds. J. G. Goldammer), pp. 159-178. Heidelberg: Springer-Verlag.
- Gillispie, A. R., Miller, B. K. & Jonson, K. D. 1994 Effects of ground cover on tree survival and growth in filter strips of the Cornbelt Region of the midwestern US. *Agriculture, Ecosystems and Environment* 53, 263-270.

- Goergen, E. & Daehler, C. C. 2001 Inflorescence damage by insects and fungi in native pili grass (*Heteropogon contortus*) versus alien fountain grass (*Pennisetum setaceum*) in Hawai'i. *Pacific Science* 55, 129-136.
- Gordon, D. R. 1998 Effects of invasive, non-indigenous plant species on ecosystem processes: lessons from Florida. *Ecological Monographs* 8, 975-989.
- Goss-Custard, J. D. & Moser, M. E. 1988 Rates of change in the numbers of dunlin, *Calidris alpina*, wintering in British estuaries in relation to the spread of *Spartina anglica*. *Journal of Applied Ecology* 25, 95-109.
- Gould, A. M. A. & Gorchoff, D. L. 2000 Effects of the exotic invasive shrub *Lonicera maackii* on the survival and fecundity of three species of native annuals. *American Midland Naturalist* 144, 36-50.
- Gremmen, N. J. M., Chown, S. L. & Marshall, D. J. 1998 Impact of the introduced grass *Agrostis stolonifera* on vegetation and soil fauna communities at Marion Island, sub-Antarctic. *Biological Conservation* 85, 223-231.
- Guix, J. C. 2000 a The red fox as a disperser of exotic plants in a coastal area of W Portugal. In *Livro de Resumos do 1º Simposio sobre Espécies Exóticas*, pp. 17. Lisboa: Liga para a Protecção da Natureza.
- Guix, J. C. 2000 b Seed dispersal and colonization of allochthonous fleshy fruiting species in forest fragments of SE Brazil. In *Livro de Resumos do 1º Simposio sobre Espécies Exóticas*, pp. 17-18. Lisboa: Liga para a Protecção da Natureza.
- Haidinger, T. L. & Keeley, J. E. 1993 Role of high fire frequency in destruction of mixed chaparral. *Madroño* 40, 141-147.
- Hester, A.J. & Hobbs, R. J. 1992 Influence of fire and soil nutrients on native and non-native annuals at remnant vegetation edges in the Western Australian wheatbelt. *Journal of Vegetation Science* 101-108.
- Hobbs, R. J. & Atkins, L. 1991 Interactions between annuals and woody perennials in a Western Australian nature reserve. *Journal of Vegetation Science* 2, 643-654.
- Holmes, P. M. & Cowling, R. M. 1997a The effects of invasion by *Acacia saligna* on the guild structure and regeneration capabilities of South African fynbos shrublands. *Journal of Applied Ecology* 34, 317-332.
- Holmes, P. M. & Cowling, R. M. 1997b Diversity, composition and guild structure relationships between soil-stored seed banks and mature vegetation in alien plant-invaded South African fynbos shrublands. *Plant Ecology* 133, 107-122.
- Holmes, T. H. & Rice, K. J. 1996 Patterns of growth and soil-water utilization in some exotic annuals and native perennial bunchgrasses of California. *Annals of Botany* 78, 233-243.
- Huenneke, L. F. & Thompson, J. K. 1994. Potential interference between a threatened endemic thistle and an invasive nonnative plant. *Conservation Biology* 9, 416-425.
- Hutchinson, T. F. & Vankat, J. L. 1997 Invasibility and effects of Amur honeysuckle in southwestern Ohio forests. *Conservation Biology* 11, 1117-1124.
- Janzen, D. 1988 Management of habitat fragments in a tropical dry forest. *Annals of Missouri Botanical Garden* 75, 105-116.

- Johnson, N. C. & Wedin, D. A. 1997 Soil carbon, nutrients, and mycorrhizae during conversion of dry tropical forest to grassland. *Ecological Applications* 7, 171-182.
- Keichiro, Y. & Shuichi, O. 2000 Impact of biological invasion of *Leucaena leucocephala* on successional pathway and species diversity of secondary forest on Hahajima Island, Ogasawara (Bonin) Islands, northwestern Pacific. *Japanese Journal of Ecology* 50, 111-119.
- Keller, B. E. M. 2000 Plant diversity in *Lythrum*, *Phragmites*, and *Typha* marshes, Massachusetts, U.S.A. *Wetlands Ecology and Management* 8, 391-401.
- Kourtev, P. S., Huang, W. Z. & Ehrenfeld, J. G. 1999 Differences in earthworm densities and nitrogen dynamics in soils under exotic and native plant species. *Biological Invasions* 1, 237-245.
- Kremer, R.G. & Running, S.W. 1996 Simulating seasonal soil water balance in contrasting semi-arid vegetation communities. *Ecological Modelling* 84, 151-162.
- Kwaitkowski, A. J., Spalik, K., Michalak, E., Palinska, A. & Panufnik, D. 1997 Influence of the size and density of *Carpinus betulus* on the spatial distribution and rate of deletion of forest-floor species in thermophilous oak forest. *Plant Ecology* 129, 1-10.
- Lacey, J.R., Marlow, C.B. & Lane, J.R. 1989 Influence of spotted knapweed (*Centaurea maculosa*) on surface runoff and sediment yield. *Weed Technology* 3, 627-631.
- Lagerlöf, J. & Wallin, H. 1993 The abundance of arthropods along two field margins with different types of vegetation composition: an experimental study. *Agriculture, Ecosystems and Environment* 43, 141-154.
- Lambrinos, J. G. 2000 The impact of the invasive alien grass *Cortaderia jubata* (Lemoine) Stapf on an endangered Mediterranean-type shrubland in California. *Diversity and Distributions* 6, 217-231.
- Latz, P. K. 1991 Buffel and couch grass in Central Australian creeks and rivers. *Newsletter of the Central Australian Conservancy Council*, April: 5.
- Lavergne, C., Rameau, J. & Figier, J. 1999 The invasive woody weed *Ligustrum robustum* subsp. *walkeri* threatens native forests on La Reunion. *Biological Invasions* 1, 377-392.
- Le Maitre, D. C., Versfeld, D. B. & Chapman, R. A. 2000 The impact of invading alien plants on surface water resources in South Africa: A preliminary assessment. *Water SA* 26, 397-408.
- Lesica, P. 1997 Spread of *Phalaris arundinacea* adversely impacts the endangered plant *Howellia awuatilis*. *Great Basin Naturalist* 57, 366-368.
- Ley, R. E. & D'Antonio, C. M. 1998 Exotic grass invasion alters potential rates of N fixation in Hawaiian woodlands. *Oecologia* 113, 179-187.
- Lippincott, C. L. 2000 Effects of *Imperata cylindrica* (cogongrass) invasion on fire regime in Florida sandhill. *Natural Areas Journal* 20, 140-149.
- Lonsdale, W. M. & Braithwaite, R. W. 1991 Assessing the effects of fire on vegetation in tropical savannas. *Australian Journal of Ecology* 16, 363-374.

- Mack, M. C., D'Antonio, C. M. & Ley, R. 2001 Alteration of ecosystem nitrogen dynamics by exotic plants: a case study of C<sub>4</sub> grasses in Hawai'i. *Ecological Applications* 11, 1323-1335.
- Martin, P. H. 1999 Norway maple (*Acer platanoides*) invasion of a natural forest stand: understory consequences and regeneration pattern. *Biological Invasions* 1, 215-222.
- McPherson, G. R., Wright, H. A. & Wester, D. B. 1988 Patterns of shrub invasion in semiarid Texas grasslands. *American Midland Naturalist* 120, 391-397.
- Melgoza, G., Nowak, R. S., Tausch, R. J. 1990 Soil water exploitation after fire: competition between *Bromus tectorum* (cheatgrass) and two native species. *Oecologia* 83, 7-13.
- Menke, J. W. 1989 Management controls on productivity. In *Grassland structure and function: California annual grassland* (ed. L. F. Huenneke & H. A. Mooney), pp. 173-199. Dordrecht: Kluwer.
- Mesléard, F., Ham, L. T., Boy, V., van Wijck, C. & Grillas, P. 1993 Competition between an introduced and an indigenous species: the case of *Paspalum paspaloides* (Michx.) Scribn. and *Aeluropus littoralis* (Gouan) in the Camargue (southern France). *Oecologia* 94, 204-209.
- Milton, S. J. & Siegfried, W. R. 1981 Above-ground biomass of Australian *Acacias* in the southern Cape, South Africa. *Journal of South African Botany* 47, 701-716.
- Morgan, J. W. 1998 Patterns of invasion of an urban remnant of a species-rich grassland in southeastern Australia by non-native plant species. *Journal of Vegetation Science* 9, 181-190.
- Mueller-Dombois, D. 1973 A non-adapted vegetation interferes with water removal in a tropical rain forest area in Hawai'i. *Tropical Ecology* 14, 1-18.
- Musil, C. F. & Midgley, G. F. 1990 The relative impact of invasive Australian acacias, fire and season on the soil chemical status of a sand plain lowland fynbos community. *South African Journal of Botany* 56, 419-427.
- Musil, C. F. 1993 Effect of invasive Australian acacias on the regeneration, growth and nutrient chemistry of South African lowland fynbos. *Journal of Applied Ecology* 30, 361-372.
- Nadkarni, N. M., Odion, D. C. & Santa Barbara Botanical Garden. 1986 Effects of seeding an exotic grass *Lolium multiflorum* on native seedling regeneration following fire in a chaparral community. In *Proceedings of the chaparral ecosystems research conference*, pp. 115-121. Santa Barbara: California Water Resource Center. Report # 62.
- Nelson, L. L. & Allen, E. B. 1993. Restoration of *Stipa pulchra* grasslands: effects of mycorrhizae and competition from *Avena barbata*. *Restoration Ecology* 1, 40-50.
- Ogle, S. M., Reiners, W. A., & Gerow, K. G. 2001 Impacts of exotic annual brome grasses on northern mixed grass prairie ecosystems. *Ecosystems*
- Pickart, A. J., Miller, L. M. & Duebendorfer, T. E. 1998 Yellow bush lupine invasion in northern California coastal dunes. I. Ecological impacts and manual restoration techniques. *Restoration Ecology* 6, 59-68.

- Pysek, P. & Pysek, A. 1995 Invasion by *Heracleum mategazzianum* in different habitats in the Czech Republic. *Journal of Vegetation Science* 6, 711-718.
- Ramos, J. A. 1996 Introduction of exotic tree species as a threat to the Azores bullfinch population. *Journal of Applied Ecology* 33, 710-722.
- Randall, J. M. & Rejmanek, M. 1993. Interference of bull thistle (*Cirsium vulgare*) with growth of ponderosa pine (*Pinus ponderosa*) seedlings in a forest plantation. *Canadian Journal of Forest Research* 23, 1507-1513.
- Richardson, D., MacDonald, I. A. W., & G. G. Forsyth. 1989 Patterns of plant species richness under stands of alien trees and shrubs in the fynbos Biome. *South African Forestry Journal* 149, 1-8.
- Richburg, J. A., Patterson, W. A. & Lowenstein, F. 2001 Effects of road salt and *Phragmites australis* invasion on the vegetation of a western Massachusetts calcareous lake-basin fen. *Wetlands* 21, 247-255.
- Romo, J. T. & Eddleman, L. E. 1987 Effects of Japanese brome on growth of bluebunch wheatgrass, junegrass and squirreltail seedlings. *Reclamation and Revegetation Research* 6, 207-218.
- Rose, S. & Fairweather, P. G. 1997 Changes in floristic composition of urban bushland invaded by *Pittosporum undulatum* in northern Sydney, Australia. *Australian Journal of Botany* 45, 123-149.
- Sala, A., Smith, S.D. & Devitt, D.A. 1996 Water use by *Tamarix ramosissima* and associated phreatophytes in a Mojave Desert floodplain. *Ecological Applications* 6, 888-898.
- Schellborn, N. A. & Sork, V. L. 1997 The impact of weed diversity on insect population dynamics and crop yield in collards, *Brassica oleracea* (Brassicaceae). *Oecologia* 111, 233-240.
- Schmidt, K. A. & Whelan, C. J. 1999 Effects of exotic *Lonicera* and *Rhamnus* on songbird nest predation. *Conservation Biology* 13, 1502-1506.
- Scott, N. A., Saggart, S. & McIntosh, P. 2001 Biogeochemical impact of *Hieracium* invasion in New Zealand's grazed tussock grasslands: sustainability implications. *Ecological Applications* 11, 1311-1322.
- Seabloom, E. W. & A. M. Wiedemann. 1994 Distribution and effects of *Ammophila breviligulata* Fern. (American beachgrass) on the foredunes of the Washington coast. *Journal of Coastal Research* 10, 178-188.
- Sharma, B.M. 1984 Ecophysiological studies on water lettuce in a polluted lake. *Journal of Aquatic Plant Management* 22, 17-21.
- Sheldon, S. P. & Creed Jr., R. P. 1995 Use of a native insect as a biological control for an introduced weed. *Ecological Applications* 5, 1122-1132.
- Shukla, J., Noble, C. & Sellers, P. 1990 Amazon deforestation and climate change. *Science* 247, 1322-1325.
- Slobodchikoff, C. N. & Doyen, J. T. 1977 Effects of *Ammophila arenaria* on sand dune arthropod communities. *Ecology* 58, 1171-1175.
- Smith, C. W. & Tunison, J. T. 1992 Fire and alien plants in Hawai'i: research and management implications for native ecosystems. In *Alien plant invasions in native*

*ecosystems of Hawai'i* (eds. C. P. Stone & J. M. Scott), pp. 394-408. Honolulu: University of Hawai'i Press.

- Smoliak, S. & Dormaar, J. F. 1985 Productivity of Russian wildrye and crested wheat-grass and their effect on prairies soils. *Journal of Range Management* 38, 403-405.
- Sparling, G. P., Hart, P. B. S., August, J. A. & Leslie, D. M. 1994 A comparison of soil and microbial carbon, nitrogen, and phosphorus contents, and macro-aggregate stability of a soil under native forest and after clearance for pastures and plantation forest. *Biology and Fertility of Soils* 17, 91-100.
- Specht, R.L. 2000 Savannah woodland vegetation in the south-east district of South Australia: the influence of evaporative aerodynamics on the foliage structure of the understorey invaded by introduced annuals. *Austral Ecology* 25, 588-599.
- Steward, G. & Hull, A. C. 1949 Cheatgrass (*Bromus tectorum*): an ecological intruder in Southern Idaho. *Ecology* 30, 58-74.
- Stock, W. D., Wienand, K. T., & Baker, A. C. 1995 Impacts of invading N<sub>2</sub>-fixing *Acacia* species on patterns of nutrient cycling in two Cape ecosystems: evidence from soil incubation studies and <sup>15</sup>N natural abundance values. *Oecologia* 101, 375-382.
- Svejcar, T. & Sheley, R. 2001 Nitrogen dynamics in perennial and annual dominated arid rangelands. *Journal of Arid Environments* 47, 33-46.
- Thomas, C. D., Ng, D., Singer, M. C. Mallet, J. L. B., Parmesan, C. & Billington, H. L. 1987 Incorporation of a European weed into the diet of a North American herbivore. *Evolution* 41, 892-901.
- Toft, R. J., Harris, R. J. & Williams, P. A. 2001 Impacts of the weed *Tradescantia fluminensis* on insect communities in fragmented forests in New Zealand. *Biological Conservation* 102, 31-46.
- Trammell, M. A. & Butler, J. L. 1995 Effects of exotic plants on native ungulate use of habitat. *Journal of Wildlife Management* 59, 810-815.
- Treberg, M. A. & Husband, B. C. 1999 Relationship between the abundance of *Lythrum salicaria* (purple loosestrife) and plant species richness along the Bar River, Canada. *Wetlands* 19, 118-125.
- Tunison, J. T., Leialoha, J. A. K., Loh, R. L., Pratt, L. W. & Higashino, P. K. 1994 *Fire effects in the coastal lowlands Hawaii Volcanoes National Park. Cooperative National Park Resources Study Unit, Tech. Rep. 88, Cooperative agreement CA 8007-2-9004*. Manoa: University of Hawaii Press.
- Tunison, J. T., Loh, R. L. & Leialoha, J. A. K. 1995 *Fire effects in the submontane seasonal zone Hawai'i Volcanoes National Park. Cooperative National Park Resources Study Unit Technical Report 96, Cooperative Agreement CA 8007-2-9003*. Manoa: University of Hawaii Press.
- Tunison, J. T., D'Antonio, C. M. & Loh, R. K. 2001 Fire and invasive plants in Hawaii Volcanoes National Park. In *Proceedings of the Invasive Species Workshop: The role of fire in the control and spread of invasive species* (eds. K. E. Galley & T. P. Wilson), pp. 122-131. Lawrence: Allen Press.
- Tyser, R. W. 1992 Vegetation associated with two alien plant species in a fescue grassland in Glacier National Park, Montana. *Great Basin Naturalist* 52, 189-193.

- Van Lill, W. S., Kruger, F. J. & Van Wyk, D. B. 1980 The effect of afforestation with *Eucalyptis grandis* Hill ex Maiden and *Pinus patula* Schlecht. et Cham. on streamflow from experimental catchments at Mokobulaan, Transvaal. *Journal of Hydrology* 48, 107-118.
- van Wilgen, B. W. & Richardson, D. M. 1985 The effects of alien shrub invasions on vegetation structure and fire behaviour in south African fynbos shrublands: a simulation study. *Journal of Applied Ecology* 22, 955-966.
- van Wilgen, B. W. & van Henbergen, H. J. 1992 Fuel properties of vegetation in Swartboskloof. In *Fire in South African fynbos shrublands: a simulation study*. *Journal of Applied Ecology* 22, 955-966.
- Vilà, M. & D'Antonio, C. M. 1998 Fruit choice and seed dispersal of invasive vs. noninvasive *Carpobrotus* (Aizoaceae) in coastal California. *Ecology* 79, 1053-1060.
- Vilà, M., Weber, E. & D'Antonio, C. M. 1998 Flowering and mating system in hybridizing *Carpobrotus* (Aizoaceae) in coastal California. *Canadian Journal of Botany* 76, 1165-1169.
- Vitousek, P. M. & Walker, L. P. 1989 Biological invasions by *Myrica faya* in Hawai'i: plant demography, nitrogen fixation and ecosystem effects. *Ecological Monographs* 59, 247-265.
- Vivrette, N. J. & Muller, C. H. 1977 Mechanism of invasion and dominance of coastal grassland by *Mesembryanthemum crystallinum*. *Ecological Monographs* 47, 301-318.
- Wardle, D. A., Nicholson, K. S. & Rahman, A. 1995 Ecological effects of the invasive weed species *Senecio jacobaea* L. (ragwort) in a New Zealand pasture. *Agriculture, Ecosystems, and the Environment* 56, 19-28.
- Weiss, P. W. 1984 Seed characteristics and regeneration of some species in invaded coastal communities. *Australian Journal of Ecology* 9, 99-106.
- Whelan, C. J. & Wilson, M. F. 1994 Fruit choice in migrating North American birds: field and aviary experiments. *Oikos* 71, 137-151.
- Whisenant, S. G. 1990 *Changing fire frequencies on Idaho's Snake river plain: ecological and management implications*. United States Department of Agriculture, Forest Service, Intermountain Research Station, General Report INT-276.
- Williams, P. A. & Karl, B. J. 1996 Fleshy fruits of indigenous and adventive plants in the diet of birds in forest remnants, Nelson, New Zealand. *New Zealand Journal of Ecology* 20, 127-145.
- Witkowski, E. T. F. & Mitchell, D. T. 1987 Variations in soil phosphorus in the fynbos biome, South Africa. *Journal of Ecology* 75, 1159-1171.
- Witkowski, E. T. F. 1991 Effects of invasive alien acacias on nutrient cycling in the coastal lowlands of the Cape fynbos. *Journal of Applied Ecology* 28, 1-15.
- Woods, K. D. 1993 Effects of invasion by *Lonicera tatarica* L. on herbs and tree seedlings in four New England forests. *American Midland Naturalist* 130, 62-74.
- Wyckoff, P. H. & Webb, S. L. 1996 Understorey influence of the invasive Norway maple (*Acer platanoides*). *Bulletin of the Torrey Botanical Club* 123, 197-205.



- Zavaleta, E. 2000 Valuing ecosystem services lost to *Tamarix* invasion in the United States. In *Invasive Species in a Changing World* (eds. H. A. Mooney & R. J. Hobbs), pp. 261-300. Washington: Island Press.
- Zedler, P. H., Gautier, C. R., McMaster, G. S. 1983 Vegetation change in response to extreme events – the effect of a short interval between fires in California chaparral and coastal scrub. *Ecology* 64, 809-818.
